# Supplementary material
Source: HighWire-hosted journal article supplement (https://cmaj.ca/highwire/filestream/59269/field_highwire_adjunct_files/0/185_2.pdf)
Supplement: 185_2.pdf [file 185_2.pdf]

## ÉDITORIAL

## Il ne faut pas jouer avec l'oxycodone

John Fletcher MB BChir MPH, Ross Tsuyuki PharmD MSc

Pour la version anglaise de l'éditorial, veuillez consulter la page 107.

Fournir aux patients des versions génériques de l'oxycodone coûte peut-être moins cher, mais ce n'est pas une bonne idée. L'oxycodone est un opiacé puissant qui, lorsqu'il est utilisé de la façon prescrite, joue un rôle important dans le contrôle de la douleur modérée à grave. Toutefois, c'est aussi une drogue populaire auprès des abuseurs.

D'innombrables commentaires dans les forums en ligne sur les drogues vantent les états euphoriques qu'il est possible d'atteindre et donnent des conseils sur la façon de préparer les comprimés pour injection intraveineuse. Un grand nombre des auteurs des commentaires semblent être des patients qui cherchent à s'injecter le médicament qui leur a été prescrit, même si certains affirment avoir acheté les comprimés sur le marché illicite. L'oxycodone est devenue un opiacé si populaire chez les abuseurs que beaucoup de pharmacies n'en gardent plus et l'annoncent pour dissuader les voleurs.

Le lien entre l'oxycodone et des décès liés aux médicaments préoccupe toutefois davantage que les risques d'abus. Le nombre de décès liés au médicament a en effet augmenté parallèlement à celui du nombre d'ordonnances d'oxycodone, principalement dans sa formulation à libération prolongée. Entre 1999 et 2004, le nombre de décès liés à l'oxycodone a quintuplé en Ontario. L'oxycodone à libération prolongée a été lancée sur le marché en 2000<sup>1</sup>. Au cours de cette période, le nombre de suicides liés à des opioïdes n'a pas augmenté et le coroner a jugé non intentionnels plus de la moitié des décès liés à des opioïdes<sup>1</sup>. On ne sait pas exactement si ces décès ont résulté d'une utilisation appropriée du médicament, mais il semble probable qu'on a cherché à contourner la libération lente aux fins de consommation abusive. La formulation à libération prolongée est habituellement 3 fois plus puissante que les comprimés ordinaires. Lorsque le médicament est écrasé, injecté ou pris avec de l'alcool, cette forte dose pourrait entraîner une dépression respiratoire et la mort.

Conscient de ces dangers et après avoir subi d'énormes pressions de la part des autorités de la santé, le fabricant de l'oxycodone à libération prolongée, Purdue Pharma Canada, a lancé une forme du médicament résistante à l'abus et a cessé en mars 2012 de fabriquer l'ancienne formulation. La nouvelle formulation est plus difficile à écraser et se transforme en gel lorsqu'on y ajoute de l'eau, ce qui rend le produit difficile à injecter. Le brevet sur l'oxycodone est toutefois venu à échéance le 25 novembre 2012 et les premiers fabricants de produits génériques ont déjà demandé l'autorisation de produire le médicament. Même si les formes génériques seront probablement toutes aussi bonnes que le médicament breveté

lorsqu'on les utilise de la façon prévue et coûteront probablement moins cher, elles rouvriront un chapitre d'abus qui, de l'avis général, devrait être fermé et le rester.

Les restrictions imposées par la loi à la production de formulations génériques sont difficiles à appliquer. L'autorisation est habituellement accordée si le fabricant peut montrer qu'il existe une équivalence pharmacocinétique relative et les exceptions à la règle ne sont pas simples. Santé Canada doit approuver un produit dont on a démontré la bioéquivalence à un médicament déjà approuvé. Le ministre de la Santé ou le Parlement ont tous deux le pouvoir d'intervenir, mais la ministre fédérale de la Santé Leona Aglukkaq a refusé de réglementer l'oxycodone générique. Les ministres provinciaux de la Santé pourraient être plus disposés à s'attaquer au problème, mais la réglementation des médicaments relève de la compétence fédérale. Le gouvernement fédéral pourrait reclasser l'oxycodone en médicament toxicomanogène, comme la morphine, ce qui permettrait d'en contrôler plus rigoureusement l'utilisation mais réduirait par conséquent l'accès à un analgésique efficace pour les patients qui en ont besoin.

Les médecins et les pharmaciens peuvent prendre des mesures positives. En prescrivant toujours l'oxycodone à libération contrôlée par son nom de marque (et en ajoutant l'avertissement « aucun substitut »), les médecins pourraient donner l'exemple en protégeant le public et leurs patients qui risquent d'abuser de leurs médicaments ou les vendre. De même, les pharmaciens pourraient distribuer des formes inviolables du médicament et éviter la substitution par un produit générique. Il existe des précédents, par exemple les antiépileptiques à libération contrôlée et d'autres médicaments qu'il est préférable de prescrire sous leur nom de marque afin d'éviter les variations de biodisponibilité. Ces mesures ne suffisent pas à elles seules. La protection des patients une consultation à la fois entraînera une adoption à la pièce, ce qui est loin de produire une politique uniforme en santé publique essentielle pour s'attaquer à un problème aussi urgent de sécurité des patients et du public.

Il y a heureusement une façon simple de s'attaquer efficacement à ce problème pharmacologique : l'intervention des comités des formulaires provinciaux. Avant que le nouveau médicament soit subventionné par les régimes provinciaux d'assurance-maladie, le comité du formulaire local doit en approuver l'ajout au formulaire provincial. Les comités utiliseraient leur pouvoir de façon responsable en décidant que les régimes provinciaux rembourseront seulement les formes inviolables d'oxycodone. Une province a déjà annoncé qu'elle

n'inclura pas dans son formulaire l'oxycodone générique qui n'est pas inviolable<sup>2</sup>. Si les médecins, les pharmaciens et les comités des formulaires provinciaux conjuguent leur efforts, nous pourrions peut-être réduire les préjudices liés à ce médicament dont on abuse beaucoup et qui peut être mortel.

## Références

1. Dhalla IA, Mamdani MM, Sivilotti MLA, et al. Prescribing of opioid analgesics and related mortality before and after the introduction of long-acting oxycodone. *CMAJ* 2009;181:891-6.

2. Ontario urges Ottawa to reconsider generic OxyContin ban. CBC News, le 23 novembre 2012. Disponible : [www.cbc.ca/news/canada/story/2012/11/23/oxycodone-drug-ban-ontario.html](http://www.cbc.ca/news/canada/story/2012/11/23/oxycodone-drug-ban-ontario.html) (consulté le 20 décembre 2012).

**Intérêts concurrents :** Voir [www.cmaj.ca/site/misc/cmaj\\_staff.xhtml](http://www.cmaj.ca/site/misc/cmaj_staff.xhtml). Ross Tsuyuki est consultant auprès de BMS-AstraZeneca, PharmaSmart International, Merck et Abbott; il a reçu des subventions de Sanofi et AstraZeneca et il siège au conseil de surveillance des données de Boehringer Ingelheim pour les études sur le dabigatran.

**Affiliations :** John Fletcher est le rédacteur en chef du *JAMC*. Ross Tsuyuki est le rédacteur en chef de la *Revue des pharmaciens du Canada*.

**Correspondance à :** Éditeur du *JAMC*, [pubs@cmaj.ca](mailto:pubs@cmaj.ca)

## RÉSUMÉS DE RECHERCHE

# Taux d'hémorragie au cours d'une thérapie à la warfarine pour traiter une fibrillation auriculaire

Tara Gomes MHS, Muhammad M. Mamdani PharmD MPH, Anne M. Holbrook MD PharmD, J. Michael Paterson MSc, Chelsea Hellings MSc, David N. Juurlink MD PhD

Pour la version anglaise de ce résumé, veuillez consulter la page 124.

**Contexte :** Même si la warfarine a fait l'objet d'études détaillées au cours d'essais cliniques, on connaît peu de choses des taux d'hémorragie attribuables à son utilisation dans la pratique clinique de routine. Nous voulions examiner des événements hémorragiques incidents dans le cadre d'une importante étude de cohorte représentative portant sur des patients atteints de fibrillation auriculaire qui commençaient un traitement à la warfarine.

**Méthodes :** Nous avons procédé à une étude de cohorte représentative portant sur des résidents de l'Ontario (âge  $\geq 66$  ans) atteints de fibrillation auriculaire qui ont commencé à prendre de la warfarine entre le 1er avril 1997 et le 31 mars 2008. Nous avons défini l'hémorragie majeure comme toute visite à l'hôpital effectuée à cause d'une hémorragie. Nous avons déterminé les taux bruts d'hémorragie au cours du traitement à la warfarine, globaux et stratifiés en fonction du score CHADS<sub>2</sub> (insuffisance cardiaque globale, hypertension, âge  $\geq 75$  ans diabète et accident vasculaire cérébral antérieur, ischémie transitoire ou thromboembolie).

**Résultats :** Nous avons inclus 125 195 patients atteints de fibrillation auriculaire qui ont commencé un traitement à la warfarine au cours de

la période de l'étude. Le taux global d'hémorragie s'est établi à 3,8 % (intervalle de confiance [IC] à 95 % 3,8 %–3,9 %) par année-personne. Le risque d'hémorragie majeure a atteint son niveau le plus élevé au cours des 30 premiers jours du traitement. Au cours de cette période, les taux d'hémorragie ont atteint 11,8 % (IC à 95 % 11,1 %–12,5 %) par année-personne chez tous les patients et 16,7 % (IC à 95 % 14,3 %–19,4 %) par année-personne chez les patients dont le score CHADS<sub>2</sub> était de 4 ou plus. Au cours du suivi à 5 ans, 10 840 patients (8,7 %) ont visité l'hôpital pour une hémorragie, dont 1963 (18,1 %) sont morts à l'hôpital ou dans les 7 jours suivant leur départ.

**Interprétation :** Dans cette importante cohorte de patients âgés atteints de fibrillation auriculaire, nous avons constaté que les taux d'hémorragie sont les plus élevés au cours des 30 premiers jours de la thérapie à la warfarine. Ces taux sont beaucoup plus élevés que ceux de 1 %–3 % signalés dans le cadre d'études contrôlées randomisées sur la thérapie à la warfarine. Notre étude fournit des estimations opportunes d'événements indésirables liés à la warfarine qui peuvent être utiles pour les cliniciens, les patients et les responsables des politiques à mesure que de nouveaux traitements deviennent disponibles.

**Intérêts concurrents :** Tara Gomes, Chelsea Hellings et David Juurlink ont reçu des subventions du Réseau de recherche sur la Politique sur les médicaments de l'Ontario. Muhammad Mamdani est consultant auprès d'AstraZeneca, Bristol-Myers Squibb, Eli Lilly, GlaxoSmithKline, Hoffmann-La Roche, Novartis, Novo Nordisk et Pfizer. Aucun autre intérêt concurrent n'a été déclaré.

Cet article a été revu par les pairs.

**Correspondance à :** Tara Gomes, [tara.gomes@ices.on.ca](mailto:tara.gomes@ices.on.ca)
